# Supplementary material for: Complete Versus Incomplete Surgical Resection in Intramedullary Astrocytoma: Systematic Review with Individual Patient Data Meta-Analysis
Source: PubMed Central journal article supplement — Global Spine J. 2022 Apr 29;13(1):227–41. doi: 10.1177/21925682221094766 (PMC9837510; doi:10.1177/21925682221094766), 2022-04-29
Supplement: sj-pdf-1-gsj-10.1177_21925682221094766.pdf [file sj-pdf-1-gsj-10.1177_21925682221094766.pdf]

Supplementary table 1. Clinical information of included studies.

|    | <b>Author &amp; year</b>     | <b>5-year OS (%)</b> | <b>10-year OS (%)</b> | <b>5-year PFS (%)</b> |
|----|------------------------------|----------------------|-----------------------|-----------------------|
| 1  | Hardison et al. 1987 (40)    | 39                   | 14                    | NR                    |
| 2  | Hulshof et al. 1993 (41)     | 30                   | 7.6                   | NR                    |
| 3  | Przybylski et al. 1997 (19)  | 88                   | 83                    | NR                    |
| 4  | Allen et al. 1998 (16)       | 54                   | NR                    | 46                    |
| 5  | Bouffet et al. 1998 (42)     | 60                   | 66                    | NR                    |
| 6  | Robinson et al. 2005 (11)    | 100                  | 75                    | 93                    |
| 7  | Zorlu et al. 2005 (30)       | 45                   | NR                    | 40                    |
| 8  | Abdel-Wahab et al. 2006 (32) | 59                   | 53                    | 42                    |
| 9  | Nakamura et al. 2008 (36)    | 60                   | NR                    | NR                    |
| 10 | McGirt et al. 2008 (12)      | 45                   | NR                    | NR                    |
| 11 | Minehan et al. 2009 (29)     | 29                   | 17                    | NR                    |
| 12 | Kahn et al. 2011 (34)        | 52                   | NR                    | NR                    |
| 13 | Sandler et al. 2011 (37)     | 68                   | NR                    | NR                    |

NR= Not reported.
